# Supplementary material
Source: bioRxiv or medRxiv preprint supplement (https://medrxiv.org/highwire/filestream/94981/field_highwire_adjunct_files/1/2020.08.29.20126201-2.pdf)
Supplement: Supplementary file [file 2020.08.29.20126201-2.pdf]

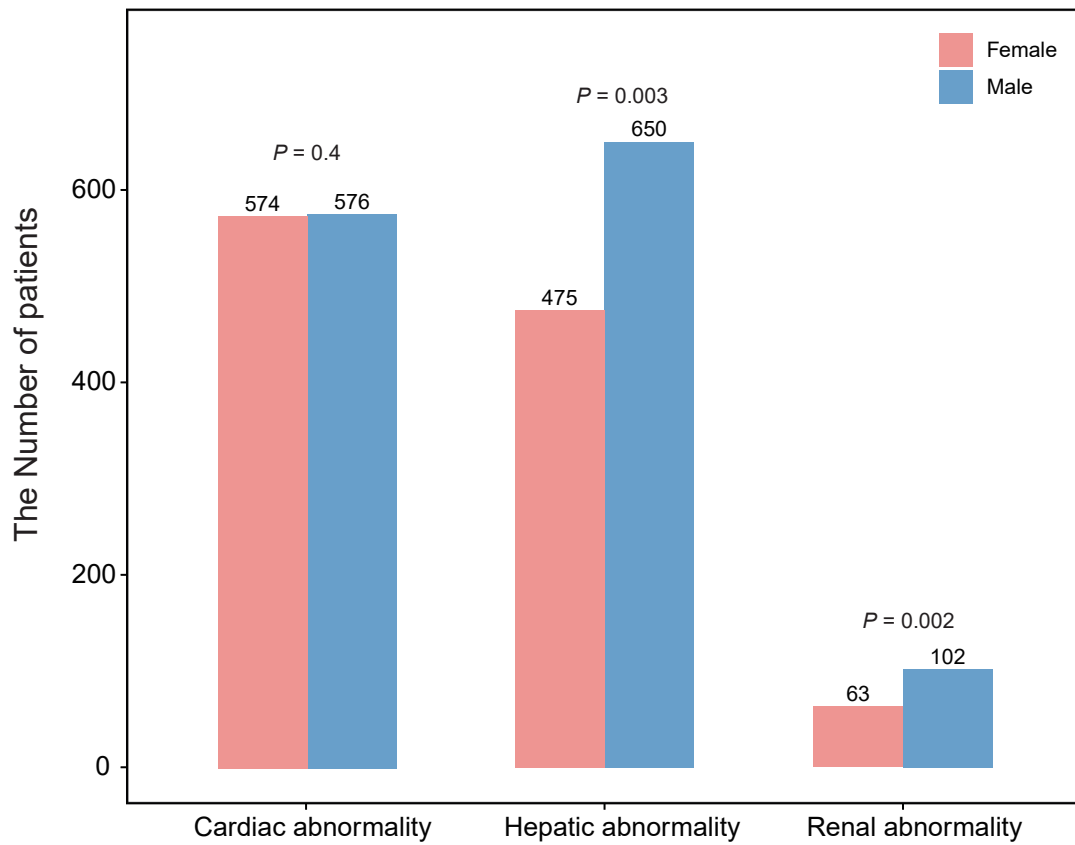

**Supplemenmtary Figure S1.** The number of patients with cardiac, hepatic, and renal abnormality.
